# Supplementary material for: Assessing the impact of corn variety and Texas terroir on flavor and alcohol yield in new-make bourbon whiskey
Source: PLoS One. 2019 Aug 8;14(8):e0220787. doi: 10.1371/journal.pone.0220787 (PMC6687180; doi:10.1371/journal.pone.0220787)
Supplement: S5 Table — (XLSX) [file pone.0220787.s005.xlsx]

## Sheet: Sheet1
	VARIETY	LOCATION	BATCH	Code	HOURS_IN	Stage	DP4+ (ppm)	DP3 (ppm)	Maltose (ppm)	Glucose (ppm)	Total Extract	Lactic Acid (ppm)	Glycerol (ppm)	Acetic Acid (ppm)	Ethanol (%ABW)
	DYNAGRO	Calhoun	1	DYNAGRO-Calhoun	0	Post Mashing	2.86633	0.051	3.293	7.789	13.9993
	DYNAGRO	Calhoun	2	DYNAGRO-Calhoun	0	Post Mashing	2.30633	0.0916667	2.731	7.737	12.866
	DYNAGRO	Calhoun	3	DYNAGRO-Calhoun	0	Post Mashing	2.435	0.103	3.02567	8.24733	13.811
	DYNAGRO	Hidalgo	1	DYNAGRO-Hidalgo	0	Post Mashing	1.74433	0.092	1.88133	6.71333	10.431
	DYNAGRO	Hidalgo	2	DYNAGRO-Hidalgo	0	Post Mashing	1.62933	0.203333	1.754	9.68433	13.271
	DYNAGRO	Hidalgo	3	DYNAGRO-Hidalgo	0	Post Mashing	1.349	0.133	1.373	7.053	9.908
	DYNAGRO	Hill	1	DYNAGRO-Hill	0	Post Mashing	2.214	0.182	2.717	9.31333	14.4263
	DYNAGRO	Hill	2	DYNAGRO-Hill	0	Post Mashing	1.58633	0.132333	1.96167	7.588	11.2683
	DYNAGRO	Hill	3	DYNAGRO-Hill	0	Post Mashing	2.884	0.0886667	3.53867	8.69333	15.2047
	MYCOGEN	Calhoun	1	MYCOGEN-Calhoun	0	Post Mashing	1.561	0.0896667	1.64367	6.66333	9.95767
	MYCOGEN	Calhoun	2	MYCOGEN-Calhoun	0	Post Mashing	1.91033	0.0773333	2.343	6.73	11.0607
	MYCOGEN	Calhoun	3	MYCOGEN-Calhoun	0	Post Mashing	1.818	0.0646667	2.266	6.563	10.7117
	MYCOGEN	Hidalgo	1	MYCOGEN-Hidalgo	0	Post Mashing	3.01567	0.047	3.446	7.974	14.4827
	MYCOGEN	Hidalgo	2	MYCOGEN-Hidalgo	0	Post Mashing
	MYCOGEN	Hidalgo	3	MYCOGEN-Hidalgo	0	Post Mashing
	MYCOGEN	Hill	1	MYCOGEN-Hill	0	Post Mashing	2.94467	0.053	3.52267	7.91833	14.4387
	MYCOGEN	Hill	2	MYCOGEN-Hill	0	Post Mashing	2.70167	0.0486667	3.22467	7.17267	13.1477
	MYCOGEN	Hill	3	MYCOGEN-Hill	0	Post Mashing	3.21667	0.0613333	3.577	8.83867	15.6937
	TERRAL	Calhoun	1	TERRAL-Calhoun	0	Post Mashing	2.927	0.0536667	3.169	8.123	14.2727
	TERRAL	Calhoun	2	TERRAL-Calhoun	0	Post Mashing	3.23133	0.0593333	3.736	8.36333	15.39
	TERRAL	Calhoun	3	TERRAL-Calhoun	0	Post Mashing
	TERRAL	Hidalgo	1	TERRAL-Hidalgo	0	Post Mashing	3.05567	0.0626667	3.63833	7.59767	14.3543
	TERRAL	Hidalgo	2	TERRAL-Hidalgo	0	Post Mashing	2.37467	0.527333	3.00033	8.56367	14.466
	TERRAL	Hidalgo	3	TERRAL-Hidalgo	0	Post Mashing	3.168	0.351	3.49133	8.092	15.1023
	TERRAL	Hansford	1	TERRAL-Hansford	0	Post Mashing	2.13433	0.131667	2.28833	7.78267	12.337
	TERRAL	Hansford	2	TERRAL-Hansford	0	Post Mashing	2.42733	0.149	2.68	8.61433	13.8707
	TERRAL	Hansford	3	TERRAL-Hansford	0	Post Mashing
	TERRAL	Hill	1	TERRAL-Hill	0	Post Mashing	2.11733	0.13	2.907	7.3	12.4553
	TERRAL	Hill	2	TERRAL-Hill	0	Post Mashing	2.938	0.057	3.423	8.24	14.6627
	TERRAL	Hill	3	TERRAL-Hill	0	Post Mashing	2.80333	0.0536667	3.18233	7.63	13.6683
	DYNAGRO	Calhoun	1	DYNAGRO-Calhoun	119.58	Post Fermentation	0.100667	0.032	0.304	2.28767	2.72433	0.0203333	0.655	0	6.02667
	DYNAGRO	Calhoun	2	DYNAGRO-Calhoun	122.25	Post Fermentation	0.104	0.028	0.21	0.392667	0.734667	0.111	0.731333	0.0436667	6.842
	DYNAGRO	Calhoun	3	DYNAGRO-Calhoun	123.25	Post Fermentation	0.095	0.0283333	0.23	1.10267	1.456	0.0793333	0.724	0.04	6.957
	DYNAGRO	Hidalgo	1	DYNAGRO-Hidalgo	118.92	Post Fermentation	0.121667	0.038	0.340667	2.66233	3.16267	0.019	0.670667	0.007	6.11233
	DYNAGRO	Hidalgo	2	DYNAGRO-Hidalgo	119.83	Post Fermentation	0.104667	0.0336667	0.222	1.23767	1.598	0.077	0.655333	0.027	5.93
	DYNAGRO	Hidalgo	3	DYNAGRO-Hidalgo	119.5	Post Fermentation	0.097	0.028	0.274667	2.70133	3.101	0.112667	0.6	0.0606667	5.56033
	DYNAGRO	Hill	1	DYNAGRO-Hill	122.33	Post Fermentation	0.110667	0.0333333	0.232667	0.603	0.979667	0.0473333	0.750333	0	6.89567
	DYNAGRO	Hill	2	DYNAGRO-Hill	122.67	Post Fermentation	0.109333	0.0306667	0.276333	0.769333	1.18567	0.0496667	0.749667	0.00866667	7.027
	DYNAGRO	Hill	3	DYNAGRO-Hill	122.25	Post Fermentation	0.105	0.03	0.224	0.883	1.242	0.066	0.758333	0.035	7.106
	MYCOGEN	Calhoun	1	MYCOGEN-Calhoun	124.75	Post Fermentation	0.104	0.0333333	0.275667	1.707	2.12	0.084	0.663	0.0423333	6.71633
	MYCOGEN	Calhoun	2	MYCOGEN-Calhoun	122	Post Fermentation	0.081	0.0233333	0.205333	1.87367	2.18333	0.0576667	0.487667	0.0236667	4.69933
	MYCOGEN	Calhoun	3	MYCOGEN-Calhoun	122	Post Fermentation	0.111667	0.037	0.288667	1.42567	1.863	0.153	0.7245	0.0716667	7.003
	MYCOGEN	Hidalgo	1	MYCOGEN-Hidalgo	122.38	Post Fermentation	0.106	0.029	0.236333	0.191	0.562333	0.183667	0.678	0.0713333	7.035
	MYCOGEN	Hidalgo	2	MYCOGEN-Hidalgo	122.83	Post Fermentation	0.114667	0.033	0.265333	2.726	3.139	0.0833333	0.680667	0.03	6.183
	MYCOGEN	Hidalgo	3	MYCOGEN-Hidalgo	122.83	Post Fermentation	0.12	0.034	0.256333	1.77467	2.185	0.146667	0.715667	0.0546667	6.74433
	MYCOGEN	Hill	1	MYCOGEN-Hill	122.5	Post Fermentation	0.121667	0.031	0.210333	0.0693333	0.432333	0.0843333	0.795667	0.021	7.58133
	MYCOGEN	Hill	2	MYCOGEN-Hill	123.83	Post Fermentation	0.065	0.0223333	0.131333	0.07	0.288667	0.052	0.607	0	5.89833
	MYCOGEN	Hill	3	MYCOGEN-Hill	122.42	Post Fermentation	0.119667	0.0293333	0.199	0.0543333	0.402333	0.0753333	0.790667	0.019	7.28667
	TERRAL	Calhoun	1	TERRAL-Calhoun	122.417	Post Fermentation	0.114	0.0376667	0.272667	1.30767	1.732	0.0683333	0.737	0.0253333	6.90133
	TERRAL	Calhoun	2	TERRAL-Calhoun	123.083	Post Fermentation	0.0973333	0.028	0.191667	0.315333	0.632333	0.0753333	0.679	0.032	7.08833
	TERRAL	Calhoun	3	TERRAL-Calhoun	122.417	Post Fermentation	0.098	0.0313333	0.209667	0.066	0.405	0.175	0.722	0.0623333	7.33433
	TERRAL	Hidalgo	1	TERRAL-Hidalgo	122.167	Post Fermentation	0.118	0.033	0.281667	1.90067	2.33333	0.0696667	0.678333	0.0163333	6.08067
	TERRAL	Hidalgo	2	TERRAL-Hidalgo	122.25	Post Fermentation	0.114667	0.0323333	0.315667	2.02	2.48267	0.048	0.708667	0	6.36767
	TERRAL	Hidalgo	3	TERRAL-Hidalgo	123.417	Post Fermentation	0.088	0.027	0.21	0.0356667	0.360667	0.152	0.689	0.0576667	7.13133
	TERRAL	Hansford	1	TERRAL-Hansford	123	Post Fermentation	0.125	0.032	0.162	0.067	0.386	0.0806667	0.661	0.025	6.78
	TERRAL	Hansford	2	TERRAL-Hansford	122.58	Post Fermentation	0.126667	0.034	0.183	0.074	0.417667	0.0886667	0.704333	0.0296667	7.358
	TERRAL	Hansford	3	TERRAL-Hansford	122.25	Post Fermentation	0.121333	0.033	0.173	0.0486667	0.376	0.120667	0.699667	0.0353333	7.152
	TERRAL	Hill	1	TERRAL-Hill	122.67	Post Fermentation	0.113	0.0346667	0.210333	0.118333	0.476333	0.078	0.78	0	7.29367
	TERRAL	Hill	2	TERRAL-Hill	122.25	Post Fermentation	0.111667	0.0346667	0.216	0.26	0.622333	0.0623333	0.749333	0	6.77433
	TERRAL	Hill	3	TERRAL-Hill	123.08	Post Fermentation	0.0923333	0.0233333	0.131	0.059	0.305667	0.064	0.629333	0.00633333	6.027
